# Supplementary material for: IL-1R8 silencing improves the anti-tumor function of freshly isolated human NK cells
Source: PubMed Central journal article supplement — J Immunother Cancer. 2022 Mar 15;10(3):e003858. doi: 10.1136/jitc-2021-003858 (PMC8928329; doi:10.1136/jitc-2021-003858), 2022-03-15
Supplement: jitc-2021-003858supp001.pdf [file jitc-2021-003858supp001.pdf]

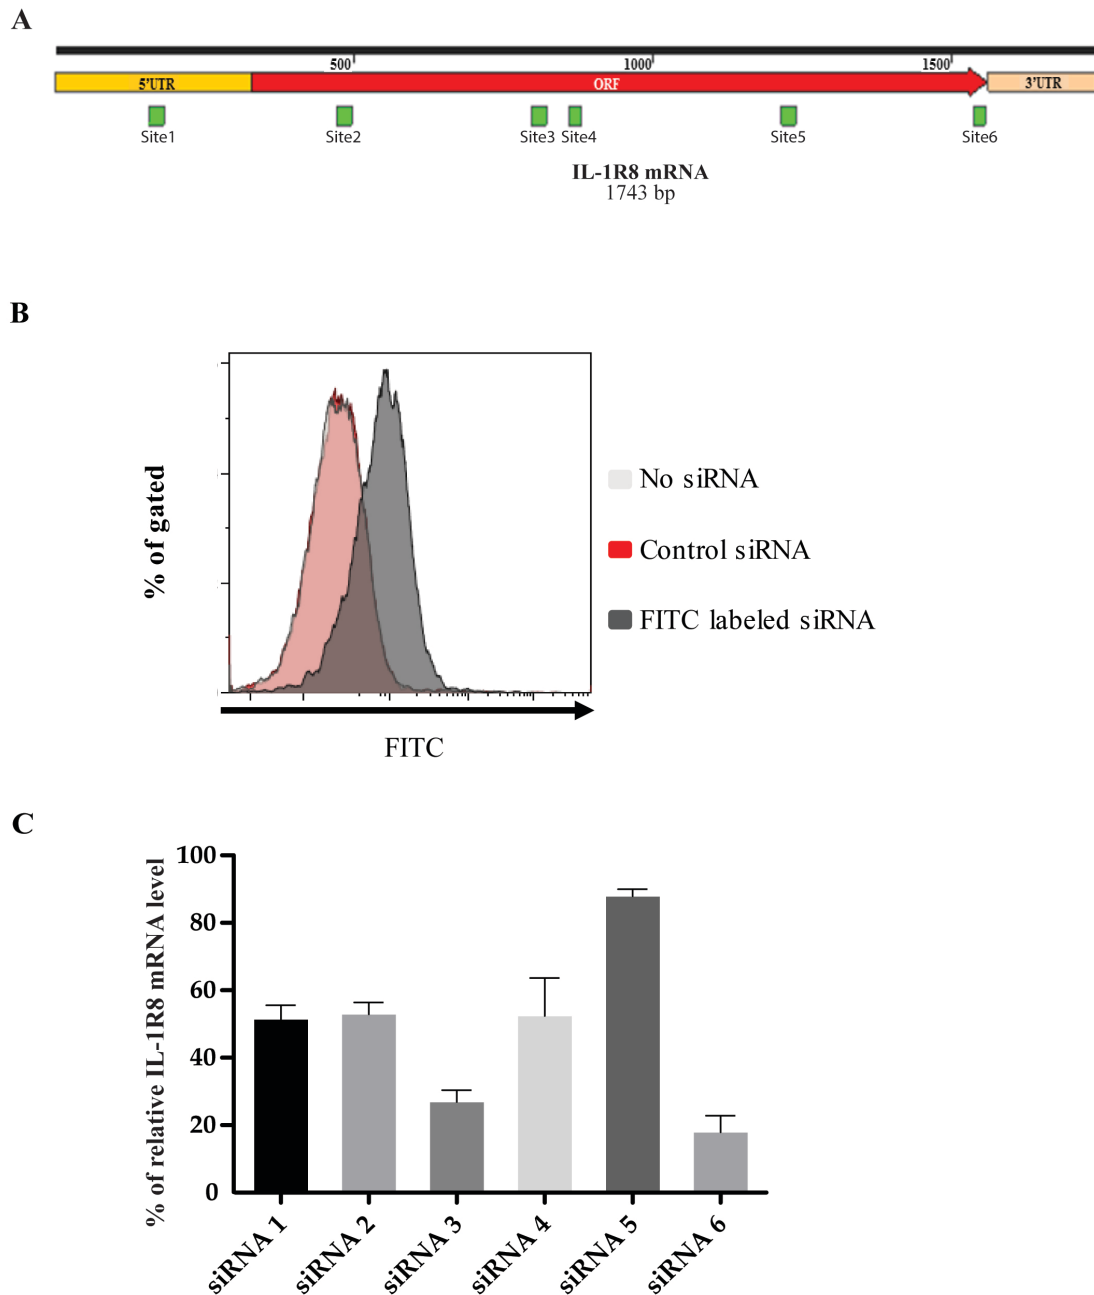

**Figure S1.** Validation of different designed siRNA for IL-1R8 silencing **A-** Schematic representation of IL-1R8 mRNA sites targeted by the selected siRNA (siRNA 1-6). The image has been generated using the SnapGene software. **B-** Flow-cytometric analysis of IL-2-cultured NK cells 24h after electroporation using control FITC labeled- siRNA. **C-** Percentage of IL1R8 Expression in siRNA-transfected IL-2-cultured NK cells (relative to mock-transfected cells).

Figure S1
