# Supplementary material for: IL-1R8 silencing improves the anti-tumor function of freshly isolated human NK cells
Source: PubMed Central journal article supplement — J Immunother Cancer. 2022 Mar 15;10(3):e003858. doi: 10.1136/jitc-2021-003858 (PMC8928329; doi:10.1136/jitc-2021-003858), 2022-03-15
Supplement: jitc-2021-003858supp002.pdf [file jitc-2021-003858supp002.pdf]

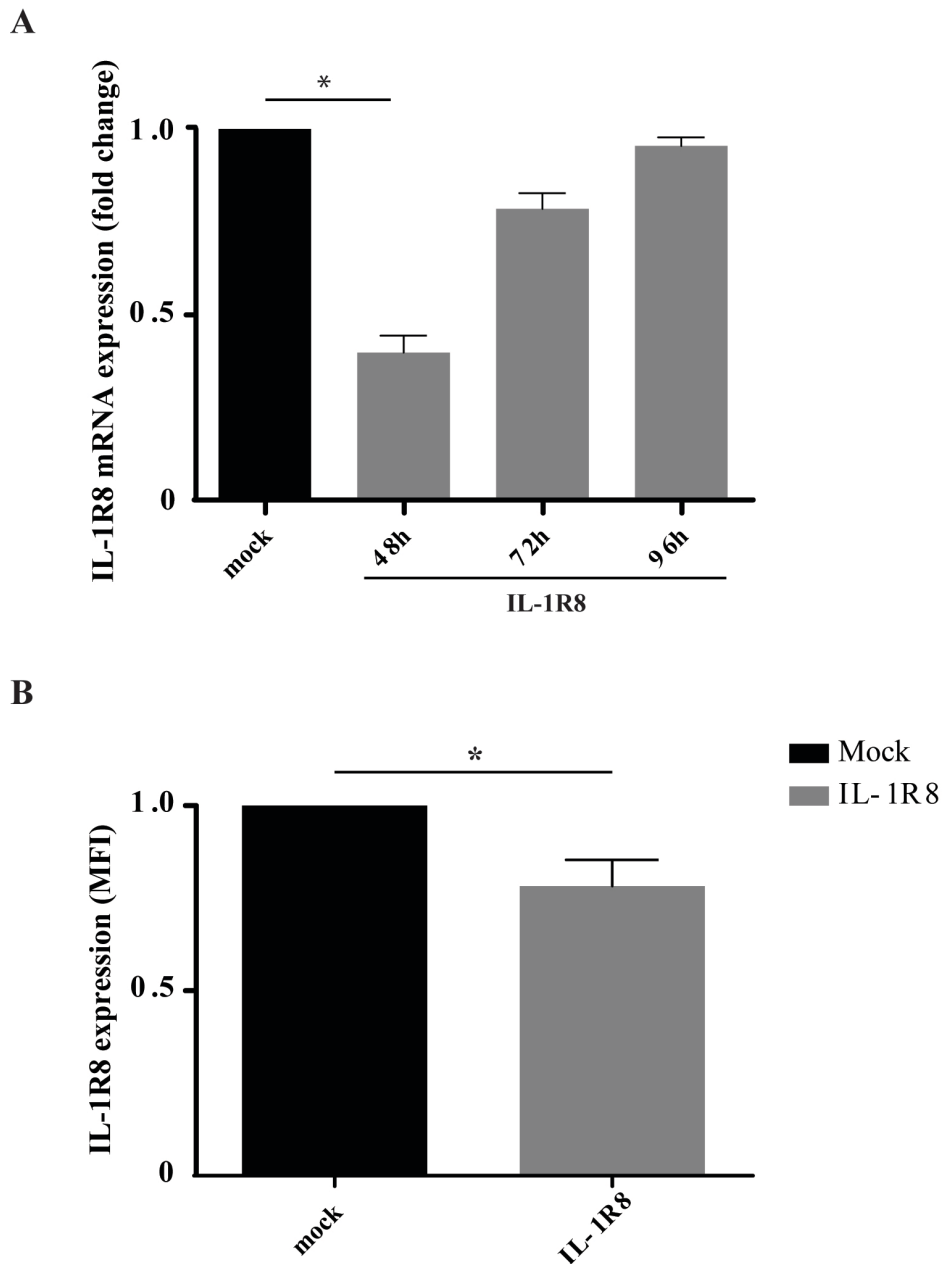

**Figure S2.** Characterization of IL-1R8 silencing in resting NK cells under basal conditions. **A**-Time course Of IL-1R8 mRNA silencing in mock- and IL-1R8-transfected resting NK cells. Values represent the mean of independent experiments performed on four healthy donors. **B**-Flow-cytometric analysis of IL-1R8 protein expression in mock- (black bar) and IL-1R8 siRNA (grey bar) resting NK cells. Values are represented as mean fluorescence intensity (MFI)  $\pm$ SEM of independent experiments performed on seven healthy donors. Statistical significance has been determined by paired t test. \* $p < 0.05$

Figure S2
