# Supplementary material for: IL-1R8 silencing improves the anti-tumor function of freshly isolated human NK cells
Source: PubMed Central journal article supplement — J Immunother Cancer. 2022 Mar 15;10(3):e003858. doi: 10.1136/jitc-2021-003858 (PMC8928329; doi:10.1136/jitc-2021-003858), 2022-03-15
Supplement: jitc-2021-003858supp003.pdf [file jitc-2021-003858supp003.pdf]

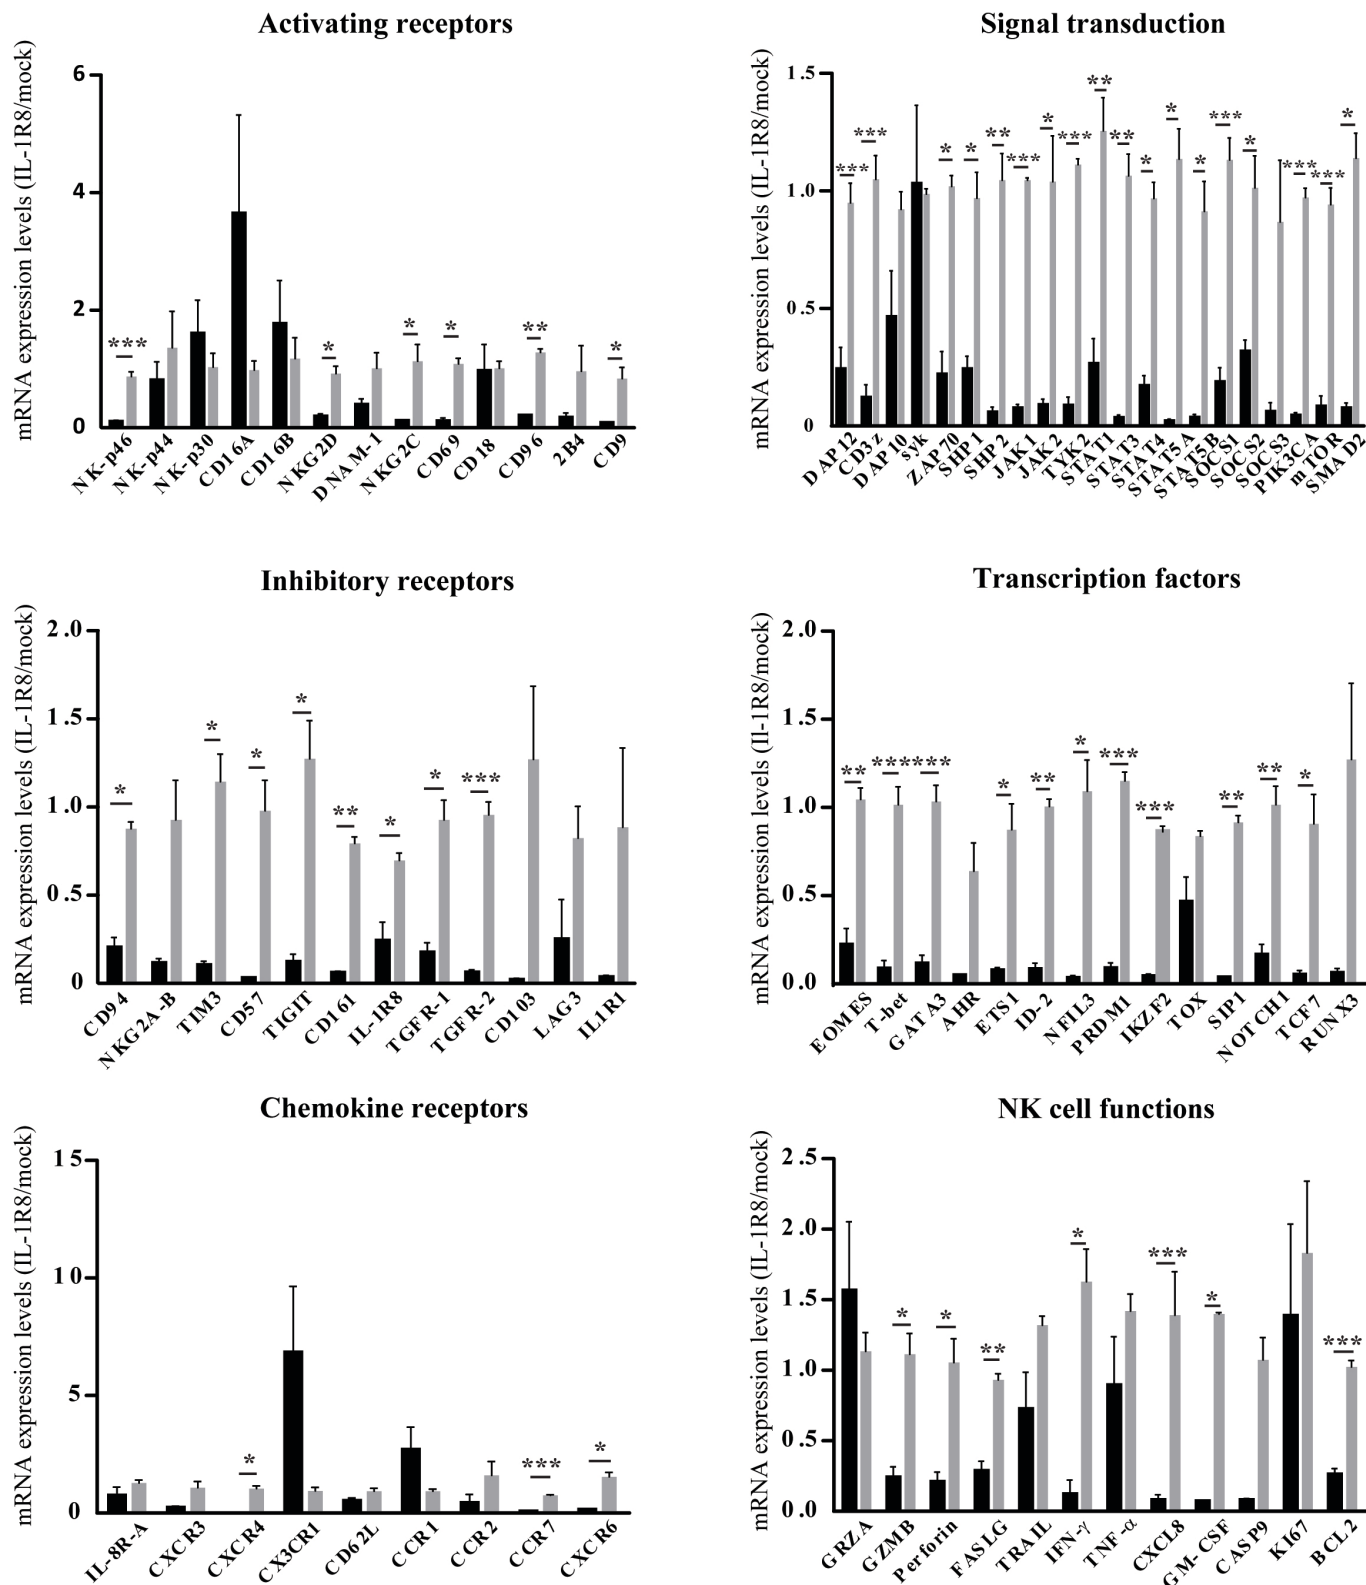

**Figure S3.** mRNA expression levels in basal and IL-15 treatment conditions. Gene expression was normalized over Actin. Values represent genes fold change calculated as a ratio between IL-1R8- and mock- siRNA transfected cells in basal condition and after 2h IL-15 treatment. Genes have been grouped according to their cellular function. Statistical significance has been determined by unpaired t test

Figure S3
