# Supplementary material for: IL-1R8 silencing improves the anti-tumor function of freshly isolated human NK cells
Source: PubMed Central journal article supplement — J Immunother Cancer. 2022 Mar 15;10(3):e003858. doi: 10.1136/jitc-2021-003858 (PMC8928329; doi:10.1136/jitc-2021-003858), 2022-03-15
Supplement: jitc-2021-003858supp004.pdf [file jitc-2021-003858supp004.pdf]

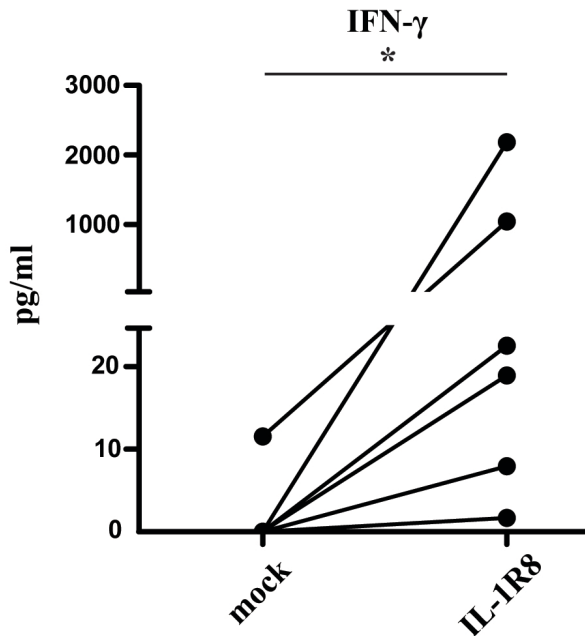

**Figure S4.** IFN- $\gamma$  secretion following IL-18 stimulation.

IFN- $\gamma$  production (pg/ml) of mock- and IL-1R8-silenced NK cells following 18h activation with IL-18.

Each dot represents one healthy donor.

Statistical significance has been determined by Mann-Whitney test. \*p < 0.05.

Figure S4
